# Supplementary material for: Magnetoliposomes with size controllable insertion of magnetic nanoparticles for efficient targeting of cancer cells
Source: Royal Society of Chemistry journal article supplement (doi:10.1039/c9ra02529d), 2019-01-01
Supplement: c9ra02529d1.pdf [file c9ra02529d1.pdf]

1 **Supplementary information**

2

3

4 Magnetoliposomes with size controllable insertion of magnetic nanoparticles for efficient  
5 targeting of cancer cells

6

7 Won Il Choi<sup>1</sup>, Abhishek Sahu<sup>2</sup>, Frederik R. Wurm<sup>3</sup> and Seong-Min Jo<sup>3,\*</sup>

8

9 <sup>1</sup>*Center for Convergence Bioceramic Materials, Convergence R&D Division, Korea Institute of*  
10 *Ceramic Engineering and Technology, 202, Osongsaengmyeong 1-ro, Osong-eup, Heungdeok-gu,*  
11 *Cheongju, Chungbuk 28160, Republic of Korea.*

12 <sup>2</sup>*School of Materials Science and Engineering, Gwangju Institute of Science and Technology, 123*  
13 *Cheomdan Gwagi-ro, Oryong dong, Buk-gu, Gwangju 61005, Republic of Korea.*

14 <sup>3</sup>*Max Planck Institute for Polymer Research, Ackermannweg 10, D-55128 Mainz, Germany*

15

16 Correspondence to Seong-Min Jo

17 : [jos@mpip-mainz.mpg.de](mailto:jos@mpip-mainz.mpg.de), [seongmini@gmail.com](mailto:seongmini@gmail.com)

18

19

20

21

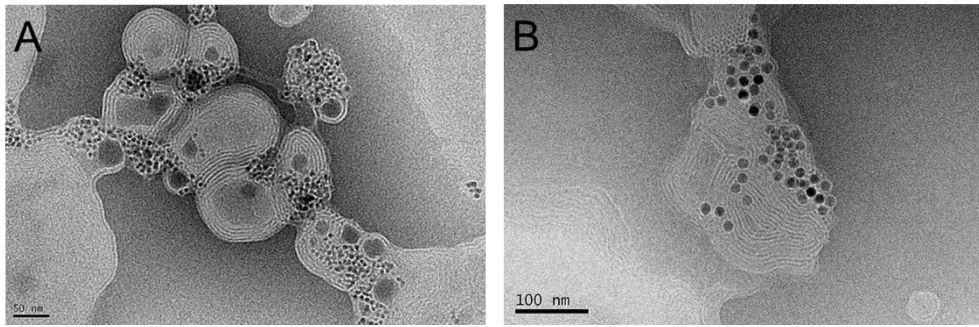

1

2 **Figure S1.** Insertion of 6 nm MNPs (A) and 15 nm MNPs (B) to egg PC liposomes

3

4

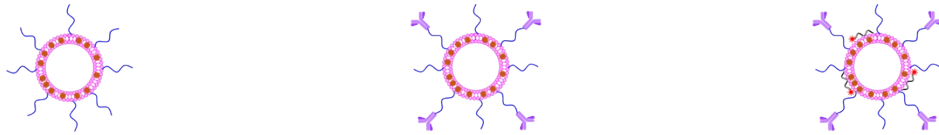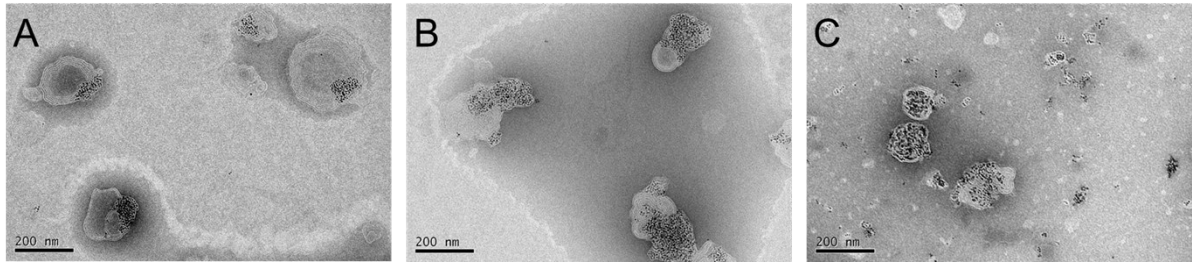

5

6 **Figure S2.** MLs after modification with NHS-PEG3400-Maleimide (A), anti-HER2 antibody (B) and  
7 oligo-DNA (C).

8

9

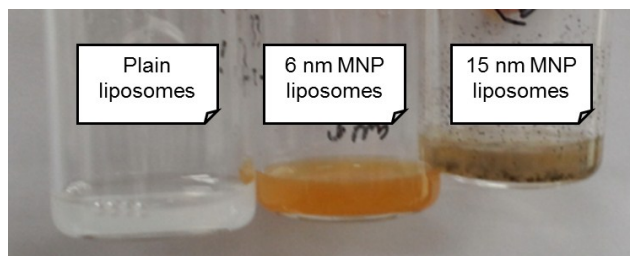

10

11 **Figure S3.** Liposomal suspension of plain DOPC/DOTAP (7/3) (left), with 6 nm MNPs (center) and  
12 with 15 nm MNPs.
